# Supplementary material
Source: ML conference proceedings conference paper supplement (https://openreview.net/forum?id=yjWir-w3gki)
Supplement: supplementary_material [file attachment]

---

# Appendix

## Reinforcement Learning with Non-Exponential Discounting

---

### A Convergence proof for the value function under hyperbolic discounting

In the following, we assume a hyperbolic survival function as presented in Eq. (2), i.e.,

$$S(t; \alpha, \beta) = \frac{1}{\left(\frac{t}{\beta} + 1\right)^\alpha}.$$

**Part I** *If the reward function  $R(\mathbf{x}, \mathbf{u}, t)$  is bounded above for all  $(\mathbf{x}, \mathbf{u}, t) \in \mathcal{X} \times \mathcal{U} \times \mathbb{R}_0^+$ , and  $\alpha_0 > 1$ , the value function defined in equation Eq. (6) is well-defined.*

We denote the supremum of the reward function  $R(\mathbf{x}, \mathbf{u}, t)$  for all  $(\mathbf{x}, \mathbf{u}, t) \in \mathcal{X} \times \mathcal{U} \times \mathbb{R}_0^+$  by  $r_{\text{sup}}$ . We find

$$\begin{aligned} V^*(\mathbf{x}, t) &= \max_{\mathbf{u}_{[t, \infty)}} \mathbb{E} \left[ \int_t^\infty \frac{S(\tau)}{S(t)} R(\mathbf{X}(\tau), \mathbf{u}(\tau), \tau) d\tau \mid \mathbf{X}(t) = \mathbf{x} \right] \\ &\leq \int_t^\infty \frac{S(\tau)}{S(t)} r_{\text{sup}} d\tau \\ &= \frac{r_{\text{sup}}}{S(t)} \int_t^\infty S(\tau) d\tau \\ &= \frac{r_{\text{sup}}}{S(t)} \int_t^\infty \frac{1}{\left(\frac{\tau}{\beta} + 1\right)^\alpha} d\tau \\ &\leq \frac{r_{\text{sup}}}{S(t)} \int_t^\infty \frac{1}{\left(\frac{\tau}{\beta}\right)^\alpha} d\tau \\ &= \frac{\beta^\alpha r_{\text{sup}}}{S(t)} \int_t^\infty \frac{1}{\tau^\alpha} d\tau \\ &= \frac{\beta^\alpha r_{\text{sup}}}{S(t)} \left[ \frac{\tau^{1-\alpha}}{1-\alpha} \right]_{\tau=t}^\infty \\ &= \frac{\beta^\alpha r_{\text{sup}}}{S(t)(1-\alpha)} \left[ \tau^{1-\alpha} \right]_{\tau=t}^\infty, \end{aligned}$$

which is finite for  $\alpha > 1$ .

**Part II** *If  $R(\mathbf{x}, \mathbf{u}, t)$  is bounded below for all  $(\mathbf{x}, \mathbf{u}, t) \in \mathcal{X} \times \mathcal{U} \times \mathbb{R}_0^+$ , and  $\alpha_0 \leq 1$ , the value function defined in equation Eq. (6) is not well-defined.*

We denote the infimum of the reward function  $R(\mathbf{x}, \mathbf{u}, t)$  for all  $(\mathbf{x}, \mathbf{u}, t) \in \mathcal{X} \times \mathcal{U} \times \mathbb{R}_0^+$  by  $r_{\inf}$ . We find

$$\begin{aligned}
V^*(\mathbf{x}, t) &= \max_{\mathbf{u}_{[t, \infty)}} \mathbb{E} \left[ \int_t^\infty \frac{S(\tau)}{S(t)} R(\mathbf{X}(\tau), \mathbf{u}(\tau), \tau) d\tau \mid \mathbf{X}(t) = \mathbf{x} \right] \\
&\geq \int_t^\infty \frac{S(\tau)}{S(t)} r_{\inf} d\tau \\
&= \frac{r_{\inf}}{S(t)} \int_t^\infty S(\tau) d\tau \\
&= \frac{r_{\inf}}{S(t)} \int_t^\infty \frac{1}{\left(\frac{\tau}{\beta} + 1\right)^\alpha} d\tau \\
&= \frac{r_{\inf}}{S(t)} \int_t^\infty \frac{1}{\left(\frac{\tau+\beta}{\beta}\right)^\alpha} d\tau \\
&= \frac{\beta^\alpha r_{\inf}}{S(t)} \int_t^\infty \frac{1}{(\tau + \beta)^\alpha} d\tau \\
&= \frac{\beta^\alpha r_{\inf}}{S(t)} \int_{t+\beta}^\infty \frac{1}{\tau^\alpha} d\tau \\
&= \frac{\beta^\alpha r_{\inf}}{S(t)} \left[ \frac{1}{\tau^\alpha} \right]_{\tau=t+\beta}^\infty \\
&= \frac{\beta^\alpha r_{\inf}}{S(t)} \left[ \frac{\tau^{1-\alpha}}{1-\alpha} \right]_{\tau=t+\beta}^\infty \\
&= \frac{\beta^\alpha r_{\inf}}{S(t)(1-\alpha)} [\tau^{1-\alpha}]_{\tau=t+\beta}^\infty,
\end{aligned}$$

in which the integral diverges for  $\alpha \leq 1$ .

## B Full derivation of the HJB equation

In this section, we provide a full derivation for the HJB equation introduced in Section 4.2. We start with the value function defined in Eq. (6), i.e.,

$$V^*(\mathbf{x}, t) = \max_{\mathbf{u}_{[t, \infty)}} \mathbb{E} \left[ \int_t^\infty \frac{S(\tau)}{S(t)} R(\mathbf{X}(\tau), \mathbf{u}(\tau), \tau) d\tau \mid \mathbf{X}(t) = \mathbf{x} \right].$$

First, we split the integral into two terms and obtain

$$\begin{aligned}
V^*(\mathbf{x}, t) &= \max_{\mathbf{u}_{[t, t+\Delta t]}} \mathbb{E} \left[ \int_t^{t+\Delta t} \frac{S(\tau)}{S(t)} R(\mathbf{X}(\tau), \mathbf{u}(\tau), \tau) d\tau \right. \\
&\quad \left. + \int_{t+\Delta t}^\infty \frac{S(\tau)}{S(t)} R(\mathbf{X}(\tau), \mathbf{u}(\tau), \tau) d\tau \mid \mathbf{X}(t) = \mathbf{x} \right].
\end{aligned}$$

By identifying the second term as the value function of state  $\mathbf{x}(t + \Delta t)$  at time  $t + \Delta t$ , we obtain the recursive formulation

$$\begin{aligned}
V^*(\mathbf{x}, t) &= \max_{\mathbf{u}_{[t, t+\Delta t]}} \mathbb{E} \left[ \int_t^{t+\Delta t} \frac{S(\tau)}{S(t)} R(\mathbf{X}(\tau), \mathbf{u}(\tau), \tau) d\tau \right. \\
&\quad \left. + \frac{S(t+\Delta t)}{S(t)} V^*(\mathbf{X}(t+\Delta t), t+\Delta t) \mid \mathbf{X}(t) = \mathbf{x} \right].
\end{aligned}$$

Consider a small  $\Delta t$ , then the first term evaluates to

$$\int_t^{t+\Delta t} \frac{S(\tau)}{S(t)} R(\mathbf{X}(\tau), \mathbf{u}(\tau), \tau) d\tau = R(\mathbf{X}(t), \mathbf{u}(t), t) \cdot \Delta t + o(\Delta t).$$

For the second term, we apply a Taylor expansion and get

$$\begin{aligned} V^*(\mathbf{X}(t + \Delta t), t + \Delta t) &= V^*(\mathbf{X}(t), t) + \int_t^{t+\Delta t} \frac{d}{d\tau} V^*(\mathbf{X}(\tau), \tau) d\tau + o(\Delta t) \\ &= V^*(\mathbf{X}(t), t) + \int_t^{t+\Delta t} V_{\mathbf{x}}^*(\mathbf{X}(\tau), \tau) d\mathbf{X}(\tau) + \int_t^{t+\Delta t} V_t^*(\mathbf{X}(\tau), \tau) d\tau + o(\Delta t). \end{aligned}$$

Here, the second term can be evaluated using Itô's formula as

$$\begin{aligned} \int_t^{t+\Delta t} V_{\mathbf{x}}^*(\mathbf{X}(\tau), \tau) d\mathbf{X}(\tau) &= \int_t^{t+\Delta t} V_{\mathbf{x}}^*(\mathbf{X}(\tau), \tau) f(\mathbf{X}(\tau), \mathbf{u}(\tau), \tau) d\tau \\ &\quad + \int_t^{t+\Delta t} \frac{1}{2} \text{tr} \{ V_{\mathbf{xx}}^*(\mathbf{X}(\tau), \tau) G(\mathbf{X}(\tau), \mathbf{u}(\tau), \tau) G(\mathbf{X}(\tau), \mathbf{u}(\tau), \tau)^T \} d\tau \\ &\quad + \int_t^{t+\Delta t} V_{\mathbf{x}}^*(\mathbf{X}(\tau), \tau) G(\mathbf{X}(\tau), \mathbf{u}(\tau), \tau) d\mathbf{W}(\tau) + o(\Delta t). \end{aligned}$$

Plugging in these terms into the equation above and dividing both sides by  $\Delta t$  yields

$$\begin{aligned} \frac{1 - \frac{S(t+\Delta t)}{S(t)}}{\Delta t} V^*(\mathbf{X}(t), t) &= \max_{\mathbf{u}_{[t, t+\Delta t]}} \mathbb{E} \left[ \frac{1}{\Delta t} \int_t^{t+\Delta t} \frac{S(\tau)}{S(t)} R(\mathbf{X}(\tau), \mathbf{u}(\tau), \tau) d\tau \right. \\ &\quad + \frac{1}{\Delta t} \int_t^{t+\Delta t} V_{\mathbf{x}}^*(\mathbf{X}(\tau), \tau) f(\mathbf{X}(\tau), \mathbf{u}(\tau), \tau) d\tau + \int_t^{t+\Delta t} V_t^*(\mathbf{X}(\tau), \tau) d\tau \\ &\quad + \frac{1}{\Delta t} \int_t^{t+\Delta t} \frac{1}{2} \text{tr} \{ V_{\mathbf{xx}}^*(\mathbf{X}(\tau), \tau) G(\mathbf{X}(\tau), \mathbf{u}(\tau), \tau) G(\mathbf{X}(\tau), \mathbf{u}(\tau), \tau)^T \} d\tau \\ &\quad \left. + \frac{1}{\Delta t} \int_t^{t+\Delta t} V_{\mathbf{x}}^*(\mathbf{X}(\tau), \tau) G(\mathbf{X}(\tau), \mathbf{u}(\tau), \tau) d\mathbf{W}(\tau) + \frac{o(\Delta t)}{\Delta t} \mid \mathbf{X}(t) = \mathbf{x} \right]. \end{aligned}$$

The factor on the l.h.s. in the limit  $\Delta t \rightarrow 0$  can be recognized to be the hazard rate (cf. Eq. (1)),

$$\lim_{\Delta t \rightarrow 0} \frac{1 - \frac{S(t+\Delta t)}{S(t)}}{\Delta t} = \lim_{\Delta t \rightarrow 0} \frac{1}{\Delta t} \frac{S(t) - S(t + \Delta t)}{\Delta t} = \alpha(t).$$

Taking the limit  $\Delta t \rightarrow 0$  on both sides and calculating the expectation w.r.t.  $\mathbf{W}(t)$ , we obtain the HJB equation

$$\begin{aligned} \alpha(t) V^*(\mathbf{x}, t) &= \max_{\mathbf{u}} [R(\mathbf{x}, \mathbf{u}, t) + V_t^*(\mathbf{x}, t) + V_{\mathbf{x}}^*(\mathbf{x}, t) f(\mathbf{x}, \mathbf{u}, t) \\ &\quad + \frac{1}{2} \text{tr} \{ V_{\mathbf{xx}}^*(\mathbf{x}, t) G(\mathbf{x}, \mathbf{u}, t) G(\mathbf{x}, \mathbf{u}, t)^T \}]. \end{aligned}$$

## C Bellman equation for discrete time

We consider the discrete-time setting, in which the objective is given as

$$J(\mathbf{u}_0, \mathbf{u}_1, \dots) = \mathbb{E} \left[ \sum_{\tau=0}^{\infty} S(\tau) R(\mathbf{X}_{\tau}, \mathbf{u}_{\tau}, \tau) \right].$$

As in the continuous-time case, we can define the value function as

$$V(\mathbf{x}, t) = \max_{\mathbf{u}_t, \mathbf{u}_{t+1}, \dots} \mathbb{E} \left[ \sum_{\tau=t}^{\infty} \frac{S(\tau)}{S(t)} R(\mathbf{X}_{\tau}, \mathbf{u}_{\tau}, \tau) \mid \mathbf{X}_t = \mathbf{x} \right].$$

By identifying the recursive definition of the value function and evaluating terms, we obtain the Bellman equation

$$V(\mathbf{x}, t) = \max_{\mathbf{u}} \{ R(\mathbf{x}, \mathbf{u}, t) + \lambda(t) \mathbb{E} [V(\mathbf{X}_{t+1}, t+1) \mid \mathbf{X}_t = \mathbf{x}] \},$$

with  $\lambda(t) = S(t+1)/S(t)$  being the hazard probability at time  $t$ .

## D Value function approximation and collocation method

In the collocation method in Algorithm 1, we need to sample random states  $\hat{\mathbf{x}}_i$  and time points  $\hat{t}_i$  for minimizing  $\sum_i E(V^\psi, \hat{\mathbf{x}}_i, \hat{t}_i)^2$ . If we assume a bounded state space  $\mathcal{X} \in \mathbb{R}$ , we can sample  $\hat{\mathbf{x}}_i$  uniformly from this space. The time points  $\hat{t}_i \in \mathbb{R}_0^+$  can be sampled from an exponential distribution. To do so, we first draw  $\hat{y}_i \sim \text{Uniform}(0, 1)$  and compute  $\hat{t}_i = -\log(1 - \hat{y}_i)/\lambda$ . To feed a normalized value of time into the network, we use  $\hat{y}_i$  instead of  $\hat{t}_i$  as input to the network. We denote the value function network depending on  $y$  by  $\tilde{V}(\mathbf{x}, y)$ . Given a specific time value  $t$ , we can compute its representation via  $y(t) = 1 - \exp(-\lambda t)$ .

When computing the partial derivative  $V_t$ , we have to take this reparametrization into account. By the chain rule, we find

$$V_t(\mathbf{x}, t) = \tilde{V}_y(\mathbf{x}, t) y_t(t),$$

for which we have with the chosen parametrization

$$y_t(t) = \lambda \exp(-\lambda t).$$

In general, there are multiple solutions to the HJB equation and the encountered solution depends on the initialization of the function approximator [29, 31]. In other work, this problem has been dealt with by omitting stochastic terms in the first episodes of training or annealing the discount factor [29, 31, 33]. We adopt the second approach and move from short to far-sighted discounting to converge to the desired solution. For hyperbolic discounting, we initially add an offset to  $\alpha_0$ , leading to a high expected hazard rate. Over time, we decrease the offset to converge to the desired solution.

## E Experiments

### Investment problem

- State space  $\mathcal{X} = [0, 1] \times [0, 1]$ , modeling account balance and interest rate, i.e.,  $\mathbf{x} = [x_b, x_i]$
- Action space  $\mathcal{U} = \{\text{spend}, \text{invest}\}$
- Dynamics model

$$f(\mathbf{x}, \mathbf{u}) = \begin{cases} [0, 0]^T & \text{if } \mathbf{u} \text{ is } \text{spend} \\ [0.1, 0]^T & \text{if } \mathbf{u} \text{ is } \text{invest} \end{cases}$$

$$G(\mathbf{x}, \mathbf{u}) = \begin{pmatrix} 0 & 0 \\ 0 & 0.01 \end{pmatrix}$$

- Reward function

$$R(\mathbf{x}, \mathbf{u}) = R^{\mathbf{x}}(\mathbf{x}) + R^{\mathbf{u}}(\mathbf{u})$$

$$R^{\mathbf{x}}([x_b, x_i]) = x_b \cdot x_i$$

$$R^{\mathbf{u}}(\mathbf{u}) = \begin{cases} 0.1 & \text{if } \mathbf{u} \text{ is } \text{spend} \\ 0 & \text{if } \mathbf{u} \text{ is } \text{invest} \end{cases}$$

- Initial belief of hazard rate  $\alpha_0 = 3, \beta_0 = 1$  (visualized in Fig. 3)

### Line problem

- State space  $\mathcal{X} = [-1, 1]$
- Action space  $\mathcal{U} = \{\text{left}, \text{stay}, \text{right}\}$
- Dynamics model

$$f(\mathbf{x}, \mathbf{u}) = \begin{cases} -1 & \text{if } \mathbf{u} \text{ is } \text{left} \\ 0 & \text{if } \mathbf{u} \text{ is } \text{stay} \\ 1 & \text{if } \mathbf{u} \text{ is } \text{right} \end{cases}$$

$$G(\mathbf{x}, \mathbf{u}) = \begin{cases} 0.05 & \text{if } \mathbf{u} \in \{\text{left}, \text{right}\} \\ 0 & \text{if } \mathbf{u} \text{ is } \text{stay} \end{cases}$$

- Reward function

$$R(\mathbf{x}, \mathbf{u}) = R^{\mathbf{x}}(\mathbf{x}) + R^{\mathbf{u}}(\mathbf{u})$$

$$R^{\mathbf{x}}(\mathbf{x}) = \begin{cases} 0.5 & \text{if } \mathbf{x} \geq 0.5 \\ \mathbf{x} & \text{if } 0 \leq \mathbf{x} < 0.5 \\ 0 & \text{if } -0.95 \leq \mathbf{x} < 0 \\ -60\mathbf{x} - 57 & \text{if } \mathbf{x} < -0.95 \end{cases}$$

$$R^{\mathbf{u}}(\mathbf{u}) = \begin{cases} 0.1 & \text{if } \mathbf{u} \in \{\text{left}, \text{right}\} \\ 0 & \text{if } \mathbf{u} \text{ is } \text{stay} \end{cases}$$

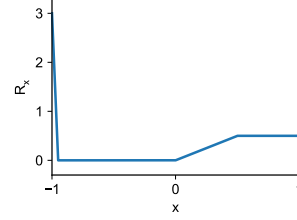

- Initial belief of hazard rate  $\alpha_0 = 5, \beta_0 = 1$  (visualized in Fig. 3)

## F Hyperparameters, implementation, and computing resources

Throughout the experiments, we have used the following hyperparameters:

- The neural networks are parametrized as

```
layers = (nn.Linear(input_dim, layer_size),
          nn.Sigmoid(),
          nn.Linear(layer_size, layer_size),
          nn.Sigmoid(),
          nn.Linear(layer_size, output_dim))
model = nn.Sequential(*layers)
```

- For the neural network representing  $V$ , we used

```
input_dim = x_dim + 1
output_dim = 1
```

- For the neural network representing  $V_\theta$ , we used

```
input_dim = x_dim + 1
output_dim = theta_dim
```

- We set  $\lambda = 0.2$ .
- For the collocation method, we used 10.000 samples in each iteration and 125.000 episodes for the investment problem and 100.000 episodes for the line problem. The initial offset of  $\alpha_0$  was set to 50 and linearly decreased to zero over 50.000 episodes.
- We used Adam optimizer with learning rate 0.003.
- For the runs with exponential discounting, the mean of the initial belief over the hazard rate was taken for  $\lambda$ , i.e., 3 for the investment problem and 5 for the line problem.

More information about Implementation and computing resources:

- Methods were implemented in Python using the PyTorch framework [71], which has been published under a BSD license.
- Resources used: Intel® Xeon® Platinum 9242 Processor, using 8 cores per run.
- Network training took ~50 min. for the investment problem and ~30 min. for the line problem.

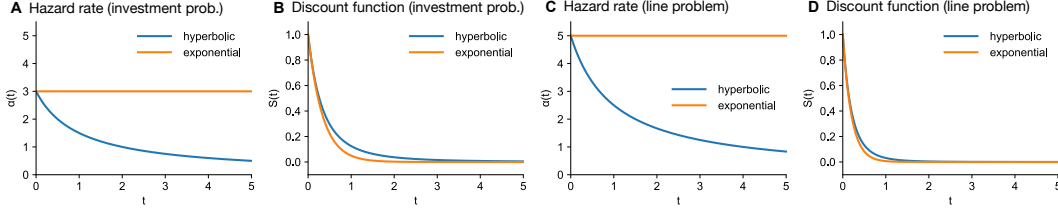

Figure 3: **Hazard rates and Discounting functions.** **A** Expected hazard rate for the investment problem. For hyperbolic discounting, the expected risk of termination is decreasing over time, while for exponential discounting, the hazard rate is constant. **B** Expected discount function for the investment problem in comparison to an exponential discount function. **C** Expected hazard rate for the line problem for hyperbolic discounting in comparison with the constant hazard rate when applying exponential discounting **D** Expected discount function for the line problem in comparison to an exponential discount function.

## G Derivation of the hyperbolic discount function as uncertainty over the constant hazard rate

We assume  $P(T > t | \lambda) = \exp(-\lambda t)$  and a belief  $\lambda \sim \text{Gamma}(\lambda; \alpha, \beta)$ . For the expected survival function, we calculate

$$\begin{aligned}
 S(t) &= \int_{\lambda} \exp(-\lambda t) p(\lambda) d\lambda \\
 &= \int_{\lambda} \exp(-\lambda t) \frac{\beta^{\alpha} \lambda^{\alpha-1} \exp(-\beta \lambda)}{\Gamma(\alpha)} d\lambda \\
 &= \int_{\lambda} \frac{\beta^{\alpha} \lambda^{\alpha-1} \exp(-(\beta + t)\lambda)}{\Gamma(\alpha)} d\lambda \\
 &= \frac{\beta^{\alpha}}{(\beta + t)^{\alpha}} \int_{\lambda} \text{Gamma}(\lambda; \alpha, \beta + t) d\lambda \\
 &= \frac{1}{\left(\frac{t}{\beta} + 1\right)^{\alpha}}.
 \end{aligned}$$

## H Interpretation of the discount factor as transition to terminal state

A Markov decision process (MDP) with discounting can be converted to an MDP without discounting by adding an additional terminal state  $\Upsilon$  [13]. From each state with a certain probability  $\gamma$ , one transitions to the terminal state, and the remaining transition probabilities are renormalized. At the terminal state there is no possibility to transition to any other state and a reward of zero is given. In continuous time, the same formalization can be applied, but we consider a rate instead at which one transitions to the terminal state. Further, we assume in the following that the rate depends on time and denote it by  $\lambda(t)$ . The probability to be in the terminal states at time  $\Upsilon$  is given by the cumulative distribution function (CDF),

$$P(\mathbf{X}(t) = \Upsilon) = P(T < t).$$

The probability of not having terminated yet is given by the complementary cumulative distribution function (CCDF),

$$\begin{aligned}
 P(\mathbf{X}(t) \neq \Upsilon) &= 1 - P(\mathbf{X}(t) = \Upsilon) \\
 &= P(T \geq t) \\
 &= S(t),
 \end{aligned}$$

which is equal to the discount function.

For a constant termination rate, one obtains the CDF and CCDF of the exponential distribution, respectively:

$$\begin{aligned}P(\mathbf{X}(t) = \Upsilon) &= \lambda \int_0^t \exp(-\lambda\tau) \, \mathrm{d}\tau \\&= 1 - \exp(-\lambda t)\end{aligned}$$

$$\begin{aligned}P(\mathbf{X}(t) \neq \Upsilon) &= 1 - P(\mathbf{X}(t) = \Upsilon) \\&= \exp(-\lambda t)\end{aligned}$$
